# Supplementary material
Source: publisher site journal article supplement (https://www.dovepress.com/get_supplementary_file.php?f=436950.xlsx)
Supplement: Supplementary file 1 [file get_supplementary_file.php]

## Sheet: Table S1
Table S1 111 B. abotus strains used for MLVA cluster analysis in present study
Key	GT	Bruce06	Bruce08	Bruce11	Bruce12	Bruce42	Bruce43	Bruce45	Bruce55	Bruce18	Bruce19	Bruce21	Bruce04	Bruce07	Bruce09	Bruce16	Bruce30	MLVA8	MLVA11	Isolated_in	Host	Species/biovar	Year	MLST9_GN	Source	Group	Index_temp	Strain	Reference
GCA_001043295	1	4	5	3	12	2	2	3	1	6	43	8	6	6	7	3	3	36	72	Inner Mongolia (Baotou city)	Human	B.abortus	2013	7	MLVABank	abortus C	10046	BAB8416	GCA_001043295 (https://www.ncbi.nlm.nih.gov/assembly/GCA_001043295.1)
2021Liu#003	2	4	5	4	12	2	2	3	3	6	43	8	3	4	3	3	5	28	82	Anhui	Cattle	B.abortus bv2	1955	7	MLVABank	abortus C	6100	CNBa091	unpublished
2021Liu#006	3	4	5	4	12	2	2	3	3	6	43	8	3	6	3	3	5	28	82	Beijing	Cattle	B.abortus bv1	1959	7	MLVABank	abortus C	6103	CNBa093	unpublished
2021Liu#001	4	4	5	3	12	2	2	3	1	6	43	8	4	6	6	3	3	36	72	Beijing	Unknown	B.abortus bv3	1953	7	MLVABank	abortus C	6098	CNBa092	unpublished
2013Jiang#092	5	4	5	3	12	2	2	3	1	6	43	8	4	7	7	3	3	36	72	Chongqing	Human	B.abortus bv3	2011	7	MLVABank	abortus C	1897	2011165\	Jiang2013 (http://www.ncbi.nlm.nih.gov/pubmed/24124546)
2013Jiang#093	6	4	5	3	12	2	2	3	1	6	43	8	4	6	7	3	3	36	72	Chongqing	Human	B.abortus bv3	2011	7	MLVABank	abortus C	1898	2011166\'	Jiang2013 (http://www.ncbi.nlm.nih.gov/pubmed/24124546)
2021Liu#016	7	4	5	3	12	2	2	3	3	6	43	8	5	8	3	3	3	112	210	Gansu	Yak	B.abortus bv9	1980	7	MLVABank	abortus C	6113	CNBa094	unpublished
2021Liu#017	8	4	5	3	12	2	2	3	3	6	43	8	5	8	3	3	3	112	210	Gansu	Sheep	B.abortus bv9	1980	7	MLVABank	abortus C	6114	CNBa095	unpublished
2021Liu#018	9	4	5	3	12	2	2	3	3	6	43	8	5	8	3	3	3	112	210	Gansu	Cattle	B.abortus bv9	1980	7	MLVABank	abortus C	6115	CNBa096	unpublished
2021Liu#019	10	4	5	3	12	2	2	3	2	8	43	8	5	8	3	3	6	117	327	Gansu	Yak	B.abortus bv9	1980	7	MLVABank	abortus C	6116	CNBa097	unpublished
2021Liu#020	11	4	5	3	12	2	2	3	2	8	43	8	5	8	3	3	4	117	327	Gansu	Goat	B.abortus bv9	1980	7	MLVABank	abortus C	6117	CNBa098	unpublished
2021Liu#021	12	4	5	3	12	2	2	3	2	8	43	8	5	8	3	3	4	117	327	Gansu	Cattle	B.abortus bv9	1980	7	MLVABank	abortus C	6118	CNBa099	unpublished
2013Jiang#085	13	4	5	3	12	2	2	3	1	6	36	8	4	5	6	3	3	36	332	Hebei	Cattle	B.abortus bv3	2011	7	MLVABank	abortus C	1890		Jiang2013 (http://www.ncbi.nlm.nih.gov/pubmed/24124546)
2013Jiang#086	14	4	5	3	12	2	2	3	1	6	43	8	4	5	5	3	3	36	72	Hebei	Cattle	B.abortus bv3	2011	7	MLVABank	abortus C	1891		Jiang2013 (http://www.ncbi.nlm.nih.gov/pubmed/24124546)
2013Jiang#087	15	4	5	3	12	2	2	3	1	6	43	8	4	5	6	3	3	36	72	Hebei	Cattle	B.abortus bv3	2011	7	MLVABank	abortus C	1892		Jiang2013 (http://www.ncbi.nlm.nih.gov/pubmed/24124546)
2013Jiang#088	16	4	5	3	12	2	2	3	1	6	43	8	4	5	6	3	3	36	72	Hebei	Cattle	B.abortus bv3	2011	7	MLVABank	abortus C	1893		Jiang2013 (http://www.ncbi.nlm.nih.gov/pubmed/24124546)
2013Jiang#089	17	4	5	3	12	2	2	3	1	6	43	8	4	5	7	3	3	36	72	Hebei	Cattle	B.abortus bv3	2011	7	MLVABank	abortus C	1894		Jiang2013 (http://www.ncbi.nlm.nih.gov/pubmed/24124546)
2013Jiang#090	18	4	5	3	12	2	2	3	1	6	43	8	4	5	7	3	3	36	72	Hebei	Cattle	B.abortus bv3	2011	7	MLVABank	abortus C	1895		Jiang2013 (http://www.ncbi.nlm.nih.gov/pubmed/24124546)
2013Jiang#096	19	4	5	3	12	2	2	3	1	6	43	8	4	7	8	3	3	36	72	Helongjiang	Cattle	B.abortus bv3	2010	7	MLVABank	abortus C	1901		Jiang2013 (http://www.ncbi.nlm.nih.gov/pubmed/24124546)
2013Jiang#097	20	4	5	3	12	2	2	3	1	6	43	8	4	7	8	3	3	36	72	Helongjiang	Cattle	B.abortus bv3	2010	7	MLVABank	abortus C	1902		Jiang2013 (http://www.ncbi.nlm.nih.gov/pubmed/24124546)
2013Jiang#098	21	4	5	3	12	2	2	3	1	6	43	8	4	7	8	3	3	36	72	Helongjiang	Cattle	B.abortus bv3	2010	7	MLVABank	abortus C	1903		Jiang2013 (http://www.ncbi.nlm.nih.gov/pubmed/24124546)
2013Jiang#099	22	4	5	3	12	2	2	3	1	6	43	8	4	7	8	3	3	36	72	Helongjiang	Cattle	B.abortus bv3	2010	7	MLVABank	abortus C	1904		Jiang2013 (http://www.ncbi.nlm.nih.gov/pubmed/24124546)
2013Jiang#102	23	4	5	4	12	2	2	3	1	6	43	8	5	4	3	4	5	37	77	Inner Mongolia	Cattle	B.abortus bv1	1984	7	MLVABank	abortus C	1907	NM1057	Jiang2013 (http://www.ncbi.nlm.nih.gov/pubmed/24124546)
2013Jiang#103	24	4	5	4	12	2	2	3	3	6	43	8	5	4	3	4	5	28	82	Inner Mongolia	Cattle	B.abortus bv1	1984	7	MLVABank	abortus C	1908	NM1058	Jiang2013 (http://www.ncbi.nlm.nih.gov/pubmed/24124546)
2013Jiang#114	25	4	5	4	12	2	2	3	3	6	43	8	5	4	3	4	5	28	82	Inner Mongolia	Ovine	B.abortus bv1	1985	7	MLVABank	abortus C	1919	NM1076	Jiang2013 (http://www.ncbi.nlm.nih.gov/pubmed/24124546)
2013Jiang#115	26	4	5	4	12	2	2	3	3	6	43	8	5	4	3	4	5	28	82	Inner Mongolia	Ovine	B.abortus bv1	1985	7	MLVABank	abortus C	1920	NM1078	Jiang2013 (http://www.ncbi.nlm.nih.gov/pubmed/24124546)
2013Jiang#116	27	4	5	4	12	2	2	3	3	6	43	8	5	4	3	4	5	28	82	Inner Mongolia	Ovine	B.abortus bv1	1985	7	MLVABank	abortus C	1921	NM1079	Jiang2013 (http://www.ncbi.nlm.nih.gov/pubmed/24124546)
2017Liu#117	28	4	5	4	12	2	2	3	3	6	43	8	3	7	2	2	4	28	82	Inner Mongolia	Ovine	B.abortus bv1	2016	7	MLVABank	abortus C	3112	NM-25	Liu2017 (https://www.ncbi.nlm.nih.gov/pubmed/28149294)
2017Liu#118	29	4	5	4	12	2	2	3	3	6	43	8	3	7	2	2	3	28	82	Inner Mongolia	Ovine	B.abortus bv1	2016	7	MLVABank	abortus C	3113	NM-26	Liu2017 (https://www.ncbi.nlm.nih.gov/pubmed/28149294)
2013Jiang#095	30	4	5	4	12	2	2	3	2	6	43	8	6	6	7	3	3	30	78	Inner Mongolia	Human	B.abortus bv3	2012	7	MLVABank	abortus C	1900		Jiang2013 (http://www.ncbi.nlm.nih.gov/pubmed/24124546)
2013Jiang#100	31	4	5	3	12	2	2	3	1	6	43	8	6	4	8	3	3	36	72	Inner Mongolia	Cattle	B.abortus bv3	1984	7	MLVABank	abortus C	1905	NM1051	Jiang2013 (http://www.ncbi.nlm.nih.gov/pubmed/24124546)
2013Jiang#101	32	4	5	2	12	2	2	3	1	6	43	8	5	4	8	3	3	116	331	Inner Mongolia	Cattle	B.abortus bv3	1984	7	MLVABank	abortus C	1906	NM1055	Jiang2013 (http://www.ncbi.nlm.nih.gov/pubmed/24124546)
2013Jiang#104	33	4	5	3	12	2	2	3	3	6	43	8	5	4	7	3	3	112	210	Inner Mongolia	Cattle	B.abortus bv3	1984	7	MLVABank	abortus C	1909	NM1061	Jiang2013 (http://www.ncbi.nlm.nih.gov/pubmed/24124546)
2013Jiang#105	34	4	5	3	12	2	2	3	2	6	43	8	6	4	4	3	3	117	328	Inner Mongolia	Cattle	B.abortus bv3	1985	7	MLVABank	abortus C	1910	NM1065	Jiang2013 (http://www.ncbi.nlm.nih.gov/pubmed/24124546)
2013Jiang#106	35	4	5	3	12	2	2	3	1	6	43	8	5	4	4	3	3	36	72	Inner Mongolia	Cattle	B.abortus bv3	1985	7	MLVABank	abortus C	1911	NM1066	Jiang2013 (http://www.ncbi.nlm.nih.gov/pubmed/24124546)
2013Jiang#107	36	4	5	3	12	2	2	3	1	6	43	8	5	4	8	3	3	36	72	Inner Mongolia	Cattle	B.abortus bv3	1985	7	MLVABank	abortus C	1912	NM1067	Jiang2013 (http://www.ncbi.nlm.nih.gov/pubmed/24124546)
2013Jiang#108	37	4	5	3	12	2	2	3	1	6	43	8	6	7	7	3	3	36	72	Inner Mongolia	Cattle	B.abortus bv3	1985	7	MLVABank	abortus C	1913	NM1068	Jiang2013 (http://www.ncbi.nlm.nih.gov/pubmed/24124546)
2013Jiang#109	38	4	5	3	12	2	2	3	1	6	43	8	5	7	9	3	3	36	72	Inner Mongolia	Ovine	B.abortus bv3	1985	7	MLVABank	abortus C	1914	NM1070	Jiang2013 (http://www.ncbi.nlm.nih.gov/pubmed/24124546)
2013Jiang#110	39	4	5	3	12	2	2	3	3	6	43	8	5	4	3	3	3	112	210	Inner Mongolia	Cattle	B.abortus bv3	1985	7	MLVABank	abortus C	1915	NM1071	Jiang2013 (http://www.ncbi.nlm.nih.gov/pubmed/24124546)
2013Jiang#111	40	4	5	3	12	2	2	3	3	7	43	8	5	4	3	3	3	112	326	Inner Mongolia	Cattle	B.abortus bv3	1985	7	MLVABank	abortus C	1916	NM1072	Jiang2013 (http://www.ncbi.nlm.nih.gov/pubmed/24124546)
2013Jiang#112	41	4	5	3	12	2	2	3	3	7	43	8	5	4	3	3	3	112	326	Inner Mongolia	Cattle	B.abortus bv3	1985	7	MLVABank	abortus C	1917	NM1074	Jiang2013 (http://www.ncbi.nlm.nih.gov/pubmed/24124546)
2013Jiang#113	42	4	5	3	12	2	2	3	2	8	43	8	5	6	3	3	3	117	327	Inner Mongolia	Cattle	B.abortus bv3	1985	7	MLVABank	abortus C	1918	NM1075	Jiang2013 (http://www.ncbi.nlm.nih.gov/pubmed/24124546)
2013Jiang#117	43	4	5	3	12	2	2	3	1	6	43	8	5	7	10	3	3	36	72	Inner Mongolia	Cattle	B.abortus bv3	1985	7	MLVABank	abortus C	1922	NM1091	Jiang2013 (http://www.ncbi.nlm.nih.gov/pubmed/24124546)
2013Jiang#118	44	4	5	3	12	2	2	3	3	7	43	8	6	4	3	4	3	112	326	Inner Mongolia	Cattle	B.abortus bv3	1985	7	MLVABank	abortus C	1923	NM1102	Jiang2013 (http://www.ncbi.nlm.nih.gov/pubmed/24124546)
2013Jiang#119	45	4	5	3	12	2	2	3	1	6	43	8	5	4	4	3	5	36	72	Inner Mongolia	Cattle	B.abortus bv3	1988	7	MLVABank	abortus C	1924	NM1132	Jiang2013 (http://www.ncbi.nlm.nih.gov/pubmed/24124546)
2013Jiang#120	46	4	5	3	12	2	2	3	1	6	43	8	5	4	8	3	3	36	72	Inner Mongolia	Cattle	B.abortus bv3	1988	7	MLVABank	abortus C	1925	NM1133	Jiang2013 (http://www.ncbi.nlm.nih.gov/pubmed/24124546)
2013Jiang#121	47	4	5	3	12	2	2	3	1	6	43	8	5	4	6	3	3	36	72	Inner Mongolia	Cattle	B.abortus bv3	1988	7	MLVABank	abortus C	1926	NM1134	Jiang2013 (http://www.ncbi.nlm.nih.gov/pubmed/24124546)
2013Jiang#122	48	4	5	3	12	2	2	3	1	6	43	8	5	4	6	3	3	36	72	Inner Mongolia	Cattle	B.abortus bv3	1988	7	MLVABank	abortus C	1927	NM1135	Jiang2013 (http://www.ncbi.nlm.nih.gov/pubmed/24124546)
2013Jiang#123	49	4	5	3	12	2	2	3	1	6	43	8	5	4	6	3	3	36	72	Inner Mongolia	Cattle	B.abortus bv3	1988	7	MLVABank	abortus C	1928	NM1136	Jiang2013 (http://www.ncbi.nlm.nih.gov/pubmed/24124546)
2013Jiang#124	50	4	5	3	12	2	2	3	1	6	43	8	5	4	6	3	3	36	72	Inner Mongolia	Cattle	B.abortus bv3	1988	7	MLVABank	abortus C	1929	NM1137	Jiang2013 (http://www.ncbi.nlm.nih.gov/pubmed/24124546)
2013Jiang#125	51	4	5	3	12	2	2	3	1	6	43	8	5	4	7	3	3	36	72	Inner Mongolia	Cattle	B.abortus bv3	1988	7	MLVABank	abortus C	1930	NM1140	Jiang2013 (http://www.ncbi.nlm.nih.gov/pubmed/24124546)
2013Jiang#126	52	4	5	3	12	2	2	3	1	6	43	8	5	4	7	3	3	36	72	Inner Mongolia	Cattle	B.abortus bv3	1988	7	MLVABank	abortus C	1931	NM1146	Jiang2013 (http://www.ncbi.nlm.nih.gov/pubmed/24124546)
2013Jiang#127	53	4	5	3	12	2	2	3	2	6	43	8	5	4	3	3	3	117	328	Inner Mongolia	Cattle	B.abortus bv3	1988	7	MLVABank	abortus C	1932	NM1147	Jiang2013 (http://www.ncbi.nlm.nih.gov/pubmed/24124546)
2013Jiang#128	54	4	5	3	12	2	2	3	1	6	43	8	5	4	7	3	3	36	72	Inner Mongolia	Cattle	B.abortus bv3	1988	7	MLVABank	abortus C	1933	NM1148	Jiang2013 (http://www.ncbi.nlm.nih.gov/pubmed/24124546)
2013Jiang#129	55	4	5	3	12	2	2	3	3	6	43	8	5	4	3	3	3	112	210	Inner Mongolia	Cattle	B.abortus bv3	1988	7	MLVABank	abortus C	1934	NM1149	Jiang2013 (http://www.ncbi.nlm.nih.gov/pubmed/24124546)
2013Jiang#130	56	4	5	3	12	2	2	3	1	6	43	8	6	4	4	3	3	36	72	Inner Mongolia	Ovine	B.abortus bv3	1988	7	MLVABank	abortus C	1935	NM1156	Jiang2013 (http://www.ncbi.nlm.nih.gov/pubmed/24124546)
2013Jiang#131	57	4	5	3	12	2	2	3	1	6	43	8	6	4	7	3	3	36	72	Inner Mongolia	Cattle	B.abortus bv3	1988	7	MLVABank	abortus C	1936	NM1158	Jiang2013 (http://www.ncbi.nlm.nih.gov/pubmed/24124546)
2013Jiang#132	58	4	5	3	12	2	2	3	1	6	43	8	5	7	8	3	3	36	72	Inner Mongolia	Cattle	B.abortus bv3	1989	7	MLVABank	abortus C	1937	NM1020	Jiang2013 (http://www.ncbi.nlm.nih.gov/pubmed/24124546)
2013Jiang#133	59	4	5	3	12	2	2	3	1	6	43	8	5	7	8	3	3	36	72	Inner Mongolia	Cattle	B.abortus bv3	1989	7	MLVABank	abortus C	1938	NM1159	Jiang2013 (http://www.ncbi.nlm.nih.gov/pubmed/24124546)
2013Jiang#134	60	4	5	3	12	2	2	3	3	7	43	8	6	4	3	4	3	112	326	Inner Mongolia	Cattle	B.abortus bv3	1989	7	MLVABank	abortus C	1939	NM1161	Jiang2013 (http://www.ncbi.nlm.nih.gov/pubmed/24124546)
2013Jiang#135	61	4	5	3	12	2	2	3	1	6	43	9	5	4	6	3	3	36	330	Inner Mongolia	Cattle	B.abortus bv3	1989	7	MLVABank	abortus C	1940	NM1169	Jiang2013 (http://www.ncbi.nlm.nih.gov/pubmed/24124546)
2013Jiang#136	62	4	5	3	12	2	2	3	1	6	43	8	5	4	5	3	3	36	72	Inner Mongolia	Cattle	B.abortus bv3	1989	7	MLVABank	abortus C	1941	NM1170	Jiang2013 (http://www.ncbi.nlm.nih.gov/pubmed/24124546)
2013Jiang#137	63	4	5	3	12	2	2	3	1	6	43	8	5	4	5	3	3	36	72	Inner Mongolia	Cattle	B.abortus bv3	1989	7	MLVABank	abortus C	1942	NM1171	Jiang2013 (http://www.ncbi.nlm.nih.gov/pubmed/24124546)
2013Jiang#138	64	4	5	3	12	2	2	3	1	6	43	8	5	4	5	3	3	36	72	Inner Mongolia	Cattle	B.abortus bv3	1989	7	MLVABank	abortus C	1943	NM1172	Jiang2013 (http://www.ncbi.nlm.nih.gov/pubmed/24124546)
2013Jiang#139	65	4	5	3	12	2	2	3	1	6	43	8	5	4	5	3	3	36	72	Inner Mongolia	Cattle	B.abortus bv3	1989	7	MLVABank	abortus C	1944	NM1173	Jiang2013 (http://www.ncbi.nlm.nih.gov/pubmed/24124546)
2013Jiang#140	66	4	5	3	12	2	2	3	1	6	43	8	6	4	7	3	3	36	72	Inner Mongolia	Cattle	B.abortus bv3	1990	7	MLVABank	abortus C	1945	NM1175	Jiang2013 (http://www.ncbi.nlm.nih.gov/pubmed/24124546)
2013Jiang#141	67	4	5	3	12	2	2	3	1	6	43	8	5	4	7	3	3	36	72	Inner Mongolia	Cattle	B.abortus bv3	1990	7	MLVABank	abortus C	1946	NM1176	Jiang2013 (http://www.ncbi.nlm.nih.gov/pubmed/24124546)
2013Jiang#142	68	4	5	3	12	2	2	3	1	6	43	8	5	4	8	3	3	36	72	Inner Mongolia	Cattle	B.abortus bv3	1990	7	MLVABank	abortus C	1947	NM1177	Jiang2013 (http://www.ncbi.nlm.nih.gov/pubmed/24124546)
2013Jiang#143	69	4	5	3	12	2	2	3	1	6	43	8	5	7	8	3	3	36	72	Inner Mongolia	Cattle	B.abortus bv3	1990	7	MLVABank	abortus C	1948	NM1178	Jiang2013 (http://www.ncbi.nlm.nih.gov/pubmed/24124546)
2013Jiang#144	70	4	5	3	12	2	2	3	1	6	43	8	5	7	8	3	3	36	72	Inner Mongolia	Cattle	B.abortus bv3	1990	7	MLVABank	abortus C	1949	NM1179	Jiang2013 (http://www.ncbi.nlm.nih.gov/pubmed/24124546)
2013Jiang#145	71	4	5	3	12	2	2	3	1	6	43	8	5	4	10	3	3	36	72	Inner Mongolia	Cattle	B.abortus bv3	1990	7	MLVABank	abortus C	1950	NM1181	Jiang2013 (http://www.ncbi.nlm.nih.gov/pubmed/24124546)
2013Jiang#146	72	4	5	3	12	2	2	3	1	6	43	8	6	4	5	3	3	36	72	Inner Mongolia	Cattle	B.abortus bv3	1990	7	MLVABank	abortus C	1951	NM1185	Jiang2013 (http://www.ncbi.nlm.nih.gov/pubmed/24124546)
2013Jiang#147	73	4	5	3	12	2	2	3	1	6	43	8	5	4	12	3	3	36	72	Inner Mongolia	Cattle	B.abortus bv3	1992	7	MLVABank	abortus C	1952	NM1200	Jiang2013 (http://www.ncbi.nlm.nih.gov/pubmed/24124546)
2013Jiang#148	74	4	5	3	12	2	2	3	3	6	43	8	5	4	3	3	5	112	210	Inner Mongolia	Cattle	B.abortus bv3	1993	7	MLVABank	abortus C	1953	NM1210	Jiang2013 (http://www.ncbi.nlm.nih.gov/pubmed/24124546)
2013Jiang#149	75	4	5	3	12	2	2	3	3	6	43	8	5	4	3	3	5	112	210	Inner Mongolia	Cattle	B.abortus bv3	1993	7	MLVABank	abortus C	1954	NM1211	Jiang2013 (http://www.ncbi.nlm.nih.gov/pubmed/24124546)
2013Jiang#150	76	4	5	3	12	2	2	3	1	6	43	8	5	4	7	3	3	36	72	Inner Mongolia	Cattle	B.abortus bv3	1994	7	MLVABank	abortus C	1955	NM1215	Jiang2013 (http://www.ncbi.nlm.nih.gov/pubmed/24124546)
2013Jiang#151	77	4	5	3	12	2	2	3	1	6	43	8	5	4	7	3	3	36	72	Inner Mongolia	Cattle	B.abortus bv3	1995	7	MLVABank	abortus C	1956	NM1218	Jiang2013 (http://www.ncbi.nlm.nih.gov/pubmed/24124546)
2013Jiang#152	78	4	5	3	12	2	2	3	1	6	43	8	5	5	7	3	3	36	72	Inner Mongolia	Cattle	B.abortus bv3	1995	7	MLVABank	abortus C	1957	NM1219	Jiang2013 (http://www.ncbi.nlm.nih.gov/pubmed/24124546)
2021Liu#028	79	4	5	3	12	2	2	3	1	6	43	8	4	6	4	3	3	36	72	Liaoning	Cattle	B.abortus bv3	1990	7	MLVABank	abortus C	6125	CNBa100	unpublished
2021Liu#014	80	4	5	3	12	3	1	5	2	6	41	9	4	4	3	4	3	202	402	Ningxia	Cattle	B.abortus bv3	1973	7	MLVABank	'Thailand'?	6111	CNBa101	unpublished
2021Liu#015	81	4	5	3	12	3	1	5	2	7	41	9	4	6	6	3	3	202	403	Ningxia	Human	B.abortus bv3	1979	7	MLVABank	'Thailand'?	6112	CNBa102	unpublished
2017Liu#176	82	4	5	3	12	2	2	3	3	6	43	8	5	4	3	3	3	112	210	QingHai	Yak	B.abortus bv3	2015	7	MLVABank	abortus C	3171	057-1	Liu2017 (https://www.ncbi.nlm.nih.gov/pubmed/28149294)
2017Liu#177	83	4	5	3	12	2	2	3	3	6	43	8	6	4	3	3	3	112	210	QingHai	Yak	B.abortus bv3	2015	7	MLVABank	abortus C	3172	057-2	Liu2017 (https://www.ncbi.nlm.nih.gov/pubmed/28149294)
2017Liu#178	84	4	5	3	12	2	2	3	3	6	43	8	6	4	3	3	3	112	210	QingHai	Yak	B.abortus bv3	2015	7	MLVABank	abortus C	3173	061-1	Liu2017 (https://www.ncbi.nlm.nih.gov/pubmed/28149294)
2021Liu#002	85	4	5	4	12	2	2	3	3	6	41	8	3	4	3	3	5	28	181	Shanghai	Cattle	B.abortus bv1	1954	7	MLVABank	abortus C	6099	CNBa104	unpublished
2021Liu#013	86	4	5	4	12	2	2	3	1	6	43	8	3	4	3	3	3	37	77	Shanghai	Cattle	B.abortus bv1	1964	7	MLVABank	abortus C	6110	CNBa103	unpublished
2021Liu#011	87	4	5	4	12	2	2	3	1	6	43	8	3	5	3	4	3	37	77	Sichuan	Human	B.abortus bv1	1963	7	MLVABank	abortus C	6108	CNBa105	unpublished
2021Liu#012	88	4	5	4	12	2	2	3	3	5	43	8	3	5	3	4	5	28	83	Sichuan	Human	B.abortus bv1	1963	7	MLVABank	abortus C	6109	CNBa108	unpublished
2021Liu#026	89	4	5	4	12	2	2	3	1	6	43	8	4	4	3	4	3	37	77	Sichuan	Yak	B.abortus bv1	1981	7	MLVABank	abortus C	6123	CNBa106	unpublished
2021Liu#027	90	4	5	4	12	2	2	3	3	6	43	8	4	4	3	4	5	28	82	Sichuan	Yak	B.abortus bv2	1981	7	MLVABank	abortus C	6124	CNBa107	unpublished
2021Liu#004	91	4	5	4	12	2	2	3	1	6	43	8	3	6	3	3	3	37	77	Tianjin	Human	B.abortus bv1	1957	7	MLVABank	abortus C	6101	CNBa109	unpublished
2021Liu#005	92	4	5	4	12	2	2	3	3	6	43	8	3	6	3	3	5	28	82	Tianjin	Human	B.abortus bv1	1957	7	MLVABank	abortus C	6102	CNBa110	unpublished
2021Liu#007	93	4	5	4	12	2	2	3	3	6	43	8	3	6	3	3	5	28	82	Xinjiang	Human	B.abortus bv1	1960	7	MLVABank	abortus C	6104	CNBa113	unpublished
2021Liu#008	94	4	5	4	12	2	2	3	3	6	43	8	3	6	3	3	5	28	82	Xinjiang	Human	B.abortus bv1	1960	7	MLVABank	abortus C	6105	CNBa114	unpublished
2013Jiang#083	95	4	5	3	12	2	2	3	1	6	43	8	4	6	5	3	3	36	72	Xinjiang	Cattle	B.abortus bv3	2011	7	MLVABank	abortus C	1888		Jiang2013 (http://www.ncbi.nlm.nih.gov/pubmed/24124546)
2013Jiang#084	96	4	5	3	12	2	2	3	1	6	43	8	4	5	11	3	3	36	72	Xinjiang	Cattle	B.abortus bv3	2011	7	MLVABank	abortus C	1889		Jiang2013 (http://www.ncbi.nlm.nih.gov/pubmed/24124546)
2013Jiang#091	97	4	5	3	12	2	2	3	1	6	43	8	5	5	5	3	3	36	72	Xinjiang	Cattle	B.abortus bv3	2011	7	MLVABank	abortus C	1896	2011163\'	Jiang2013 (http://www.ncbi.nlm.nih.gov/pubmed/24124546)
2021Liu#009	98	4	5	3	12	2	2	3	3	6	43	8	3	7	11	3	5	112	210	Xinjiang	Cattle	B.abortus bv3	1961	7	MLVABank	abortus C	6106	CNBa115	unpublished
2021Liu#010	99	4	5	3	12	2	2	3	2	6	43	8	3	7	11	3	3	117	328	Xinjiang	Cattle	B.abortus bv3	1961	7	MLVABank	abortus C	6107	CNBa118	unpublished
2021Liu#022	100	4	5	3	12	2	2	3	1	6	43	8	5	8	3	3	3	36	72	Xinjiang	Cattle	B.abortus bv9	1980	7	MLVABank	abortus C	6119	CNBa111	unpublished
2021Liu#023	101	4	5	3	12	2	2	3	1	6	43	8	5	8	3	3	3	36	72	Xinjiang	Cattle	B.abortus bv9	1980	7	MLVABank	abortus C	6120	CNBa112	unpublished
2021Liu#024	102	4	5	3	12	2	2	3	3	6	43	8	5	8	3	3	3	112	210	Xinjiang	Cattle	B.abortus bv9	1980	7	MLVABank	abortus C	6121	CNBa116	unpublished
2021Liu#025	103	4	5	3	12	2	2	3	3	6	43	8	5	8	3	3	3	112	210	Xinjiang	Cattle	B.abortus bv9	1980	7	MLVABank	abortus C	6122	CNBa117	unpublished
2013Jiang#094	104	4	5	3	12	2	2	3	1	6	43	8	4	6	7	3	3	36	72	Zhejiang	Human	B.abortus bv3	2006	7	MLVABank	abortus C	1899	YLQ	Jiang2013 (http://www.ncbi.nlm.nih.gov/pubmed/24124546)
Ma10	107	4	5	3	12	2	2	3	3	6	43	8	4	4	3	3	3	112		Datong county	Yak	B. abortus	1973	2	Junying Ma, et al. (http://www.idpjournal.com/content/4/1/)
Ma65	108	4	5	3	12	2	2	3	1	6	43	8	4	6	7	3	3	36		Xining county	Cattle	B. abortus	1980	2	Junying Ma, et al. (http://www.idpjournal.com/content/4/1/)
Ma51	109	4	5	4	12	2	2	3	3	6	43	8	3	6	3	3	5	28		Dulan county	Yak	B. abortus	1980	5	Junying Ma, et al. (http://www.idpjournal.com/content/4/1/)
Ma08	110	4	5	4	12	2	2	3	3	6	43	8	3	6	3	3	5	28		Xinghai county	Human	B. abortus	1965	5	Junying Ma, et al. (http://www.idpjournal.com/content/4/1/)
HT4	111	2	5	4	12	2	3	3	3	6	43	8	3	7	3	3	5			Xingjiang	marmot	B.abortus bv1	2018		10.7589/2019-09-237
Xhm5	105	1	5	3	12	2	2	3	1	6	43	8	4	6	8	3	3	N8-1	N11-1	Henan county	Marmot	B. abortus	2021		This study
Xhm22	106	1	5	3	12	2	2	3	1	6	43	8	4	5	6	3	3	N8-2	N11-2	Menyuan county	Human	B. abortus	2021		This study

## Sheet: Table S2
Table S2 74 B. abortus genome used in the this study
#Organism/Name	Strain	isolatedin	time	host	Bio-vars	BioSample	BioProject	Group	SubGroup	Assembly	Size (Mb)	GC%	Replicons	WGS	Scaffolds	Genes	Proteins	Release Date	Modify Date	Level	RefSeq FTP	GenBank FTP
Brucella abortus 2308	B. a. 23	Reference strains				SAMEA3138256	PRJNA16203	Proteobacteria	Alphaproteobacteria	GCA_000054005.1	3.27831	57.2353	chromosome I:NC_007618.1/AM040264.1; chromosome II:NC_007624.1/AM040265.1	-	2	3155	2950	38678	43875	Complete Genome	ftp://ftp.ncbi.nlm.nih.gov/genomes/all/GCF/000/054/005/GCF_000054005.1_ASM5400v1	ftp://ftp.ncbi.nlm.nih.gov/genomes/all/GCA/000/054/005/GCA_000054005.1_ASM5400v1
Brucella abortus 82	82	Russia	1960	Cattle		SAMN02470870	PRJNA219446	Proteobacteria	Alphaproteobacteria	GCA_000473805.1	3.25021	57.2	-	AXBQ01	66	3131	2750	41547	43828	Contig	ftp://ftp.ncbi.nlm.nih.gov/genomes/all/GCF/000/473/805/GCF_000473805.1_Brucella82	ftp://ftp.ncbi.nlm.nih.gov/genomes/all/GCA/000/473/805/GCA_000473805.1_Brucella82
Brucella abortus bv. 1 str. 134	134	China	2001	Human	bv.1	SAMN02469348	PRJNA174380	Proteobacteria	Alphaproteobacteria	GCA_000298635.1	3.24856	57.3	-	AMPC01	141	3137	2937	41171	43820	Contig	ftp://ftp.ncbi.nlm.nih.gov/genomes/all/GCF/000/298/635/GCF_000298635.1_V1.0_of_Brucella_abortus_bv.1_str_134	ftp://ftp.ncbi.nlm.nih.gov/genomes/all/GCA/000/298/635/GCA_000298635.1_V1.0_of_Brucella_abortus_bv.1_str_134
Brucella abortus	1046	Italy	2011	cattle		SAMN03734747	PRJNA284953	Proteobacteria	Alphaproteobacteria	GCA_001402005.1	3.26345	57.2	-	LITY01	18	3143	2954	42298	43854	Contig	ftp://ftp.ncbi.nlm.nih.gov/genomes/all/GCF/001/402/005/GCF_001402005.1_ASM140200v1	ftp://ftp.ncbi.nlm.nih.gov/genomes/all/GCA/001/402/005/GCA_001402005.1_ASM140200v1
Brucella abortus	1365.1	Italy	2011	cattle	bv.3	SAMN03965480	PRJNA284953	Proteobacteria	Alphaproteobacteria	GCA_001401935.1	3.27082	57.2	-	LITV01	13	3157	2950	42298	43854	Contig	ftp://ftp.ncbi.nlm.nih.gov/genomes/all/GCF/001/401/935/GCF_001401935.1_ASM140193v1	ftp://ftp.ncbi.nlm.nih.gov/genomes/all/GCA/001/401/935/GCA_001401935.1_ASM140193v1
Brucella abortus 93/1	1993	Bolivia	1993	cow		SAMN00811172	PRJNA173619	Proteobacteria	Alphaproteobacteria	GCA_000366485.1	3.28543	57.2	-	AQLV01	4	3163	2958	41380	43788	Contig	ftp://ftp.ncbi.nlm.nih.gov/genomes/all/GCF/000/366/485/GCF_000366485.1_Bruc_abor_93_1_V1	ftp://ftp.ncbi.nlm.nih.gov/genomes/all/GCA/000/366/485/GCA_000366485.1_Bruc_abor_93_1_V1
Brucella abortus 01-0065	01-0065	USA	2000	Bison		SAMN02092520	PRJNA200941	Proteobacteria	Alphaproteobacteria	GCA_000413795.1	3.28674	57.2	-	ATGO01	4	3164	2957	41446	43839	Contig	ftp://ftp.ncbi.nlm.nih.gov/genomes/all/GCF/000/413/795/GCF_000413795.1_Bruc_abor_biovar_1_01-0065_V1	ftp://ftp.ncbi.nlm.nih.gov/genomes/all/GCA/000/413/795/GCA_000413795.1_Bruc_abor_biovar_1_01-0065_V1
Brucella abortus 104M	104M	China	2013	cattle		SAMN03108762	PRJNA263969	Proteobacteria	Alphaproteobacteria	GCA_001296965.1	3.28543	57.2354	chromosome 1:NZ_CP009625.1/CP009625.1; chromosome 2:NZ_CP009626.1/CP009626.1	-	2	3152	2957	42269	43872	Complete Genome	ftp://ftp.ncbi.nlm.nih.gov/genomes/all/GCF/001/296/965/GCF_001296965.1_ASM129696v1	ftp://ftp.ncbi.nlm.nih.gov/genomes/all/GCA/001/296/965/GCA_001296965.1_ASM129696v1
Brucella abortus 63/130	63/130	Egypt	1963	Unknown		SAMN00839718	PRJNA173521	Proteobacteria	Alphaproteobacteria	GCA_000369985.1	3.30442	57.2	-	AQIU01	4	3180	2962	41380	43788	Scaffold	ftp://ftp.ncbi.nlm.nih.gov/genomes/all/GCF/000/369/985/GCF_000369985.1_Bruc_abor_63_130_V1	ftp://ftp.ncbi.nlm.nih.gov/genomes/all/GCA/000/369/985/GCA_000369985.1_Bruc_abor_63_130_V1
Brucella abortus 63/138	63/138	Germany	1963	Human		SAMN00839721	PRJNA173524	Proteobacteria	Alphaproteobacteria	GCA_000370005.1	3.29745	57.2	-	AQIV01	5	3180	2968	41380	43788	Scaffold	ftp://ftp.ncbi.nlm.nih.gov/genomes/all/GCF/000/370/005/GCF_000370005.1_Bruc_abor_63_138_V1	ftp://ftp.ncbi.nlm.nih.gov/genomes/all/GCA/000/370/005/GCA_000370005.1_Bruc_abor_63_138_V1
Brucella abortus 63/144	63/144	France	1963	Human		SAMN00839719	PRJNA173522	Proteobacteria	Alphaproteobacteria	GCA_000370025.1	3.28409	57.2	-	AQIW01	4	3162	2967	41380	43788	Scaffold	ftp://ftp.ncbi.nlm.nih.gov/genomes/all/GCF/000/370/025/GCF_000370025.1_Bruc_abor_63_144_V1	ftp://ftp.ncbi.nlm.nih.gov/genomes/all/GCA/000/370/025/GCA_000370025.1_Bruc_abor_63_144_V1
Brucella abortus 63/294	63/294	Kenya	1963	Unknown		SAMN00811181	PRJNA173575	Proteobacteria	Alphaproteobacteria	GCA_000370065.1	3.28563	57.2	-	AQIY01	32	3167	2914	41380	43788	Scaffold	ftp://ftp.ncbi.nlm.nih.gov/genomes/all/GCF/000/370/065/GCF_000370065.1_Bruc_abor_63_294_V1	ftp://ftp.ncbi.nlm.nih.gov/genomes/all/GCA/000/370/065/GCA_000370065.1_Bruc_abor_63_294_V1
Brucella abortus 63/59	63/59	Poland	1963	Unknown		SAMN00811192	PRJNA173584	Proteobacteria	Alphaproteobacteria	GCA_000366605.1	3.28638	57.2	-	AQLJ01	5	3162	2956	41380	43788	Contig	ftp://ftp.ncbi.nlm.nih.gov/genomes/all/GCF/000/366/605/GCF_000366605.1_Bruc_abor_63_59_V1	ftp://ftp.ncbi.nlm.nih.gov/genomes/all/GCA/000/366/605/GCA_000366605.1_Bruc_abor_63_59_V1
Brucella abortus 64/122	64/122	United Kingdom	1964	Bovine		SAMN00811214	PRJNA173627	Proteobacteria	Alphaproteobacteria	GCA_000366285.1	3.27856	57.2	-	AQLK01	4	3158	2965	41380	43788	Contig	ftp://ftp.ncbi.nlm.nih.gov/genomes/all/GCF/000/366/285/GCF_000366285.1_Bruc_abor_64_122_V1	ftp://ftp.ncbi.nlm.nih.gov/genomes/all/GCA/000/366/285/GCA_000366285.1_Bruc_abor_64_122_V1
Brucella abortus 65/110	65/110	Nigeria	1965	Unknown		SAMN00811225	PRJNA173631	Proteobacteria	Alphaproteobacteria	GCA_000366105.1	3.28159	57.2	-	AQLL01	11	3161	2950	41380	43788	Contig	ftp://ftp.ncbi.nlm.nih.gov/genomes/all/GCF/000/366/105/GCF_000366105.1_Bruc_abor_65_110_V1	ftp://ftp.ncbi.nlm.nih.gov/genomes/all/GCA/000/366/105/GCA_000366105.1_Bruc_abor_65_110_V1
Brucella abortus 65/157	65/157	Uganda	1965	Unknown		SAMN00811236	PRJNA173622	Proteobacteria	Alphaproteobacteria	GCA_000370125.1	3.27895	57.2	-	AQJB01	6	3157	2957	41380	43788	Scaffold	ftp://ftp.ncbi.nlm.nih.gov/genomes/all/GCF/000/370/125/GCF_000370125.1_Bruc_abor_65_157_V1	ftp://ftp.ncbi.nlm.nih.gov/genomes/all/GCA/000/370/125/GCA_000370125.1_Bruc_abor_65_157_V1
Brucella abortus 67/93	67/93	Iraq	1967	Water Buffalo		SAMN00839710	PRJNA173513	Proteobacteria	Alphaproteobacteria	GCA_000370165.1	3.30775	57.2	-	AQJD01	5	3180	2963	41380	43788	Scaffold	ftp://ftp.ncbi.nlm.nih.gov/genomes/all/GCF/000/370/165/GCF_000370165.1_Bruc_abor_67_93_V1	ftp://ftp.ncbi.nlm.nih.gov/genomes/all/GCA/000/370/165/GCA_000370165.1_Bruc_abor_67_93_V1
Brucella abortus 78/14	78/14	Chad	1978	Bovine		SAMN00839723	PRJNA173526	Proteobacteria	Alphaproteobacteria	GCA_000370185.1	3.28805	57.2	-	AQJE01	5	3165	2961	41380	43788	Scaffold	ftp://ftp.ncbi.nlm.nih.gov/genomes/all/GCF/000/370/185/GCF_000370185.1_Bruc_abor_78_14_V1	ftp://ftp.ncbi.nlm.nih.gov/genomes/all/GCA/000/370/185/GCA_000370185.1_Bruc_abor_78_14_V1
Brucella abortus 78/32	78/32	Senegal	1978	Bovine		SAMN01047749	PRJNA176538	Proteobacteria	Alphaproteobacteria	GCA_000370205.1	3.28223	57.2	-	AQJF01	9	3160	2939	41380	43788	Scaffold	ftp://ftp.ncbi.nlm.nih.gov/genomes/all/GCF/000/370/205/GCF_000370205.1_Bruc_abor_78_32_V1	ftp://ftp.ncbi.nlm.nih.gov/genomes/all/GCA/000/370/205/GCA_000370205.1_Bruc_abor_78_32_V1
Brucella abortus 84/26	84/26	Mexico	1984	Human		SAMN00839698	PRJNA173501	Proteobacteria	Alphaproteobacteria	GCA_000370265.1	3.3058	57.2	-	AQJI01	4	3186	2958	41380	43788	Scaffold	ftp://ftp.ncbi.nlm.nih.gov/genomes/all/GCF/000/370/265/GCF_000370265.1_Bruc_abor_84_26_V1	ftp://ftp.ncbi.nlm.nih.gov/genomes/all/GCA/000/370/265/GCA_000370265.1_Bruc_abor_84_26_V1
Brucella abortus 85/140	85/140	Greece	1985	Bovine		SAMN00811164	PRJNA173596	Proteobacteria	Alphaproteobacteria	GCA_000366385.1	3.28118	57.2	-	AQLQ01	7	3159	2955	41380	43788	Contig	ftp://ftp.ncbi.nlm.nih.gov/genomes/all/GCF/000/366/385/GCF_000366385.1_Bruc_abor_85_140_V1	ftp://ftp.ncbi.nlm.nih.gov/genomes/all/GCA/000/366/385/GCA_000366385.1_Bruc_abor_85_140_V1
Brucella abortus 877/67	877/67	United Kingdom	1967	Bovine		SAMN00811167	PRJNA173628	Proteobacteria	Alphaproteobacteria	GCA_000370325.1	3.27858	57.2	-	AQJL01	9	3162	2961	41380	43788	Scaffold	ftp://ftp.ncbi.nlm.nih.gov/genomes/all/GCF/000/370/325/GCF_000370325.1_Bruc_abor_877_67_V1	ftp://ftp.ncbi.nlm.nih.gov/genomes/all/GCA/000/370/325/GCA_000370325.1_Bruc_abor_877_67_V1
Brucella abortus 88/19	88/19	Spain	1988	Bovine		SAMN00811168	PRJNA173572	Proteobacteria	Alphaproteobacteria	GCA_000366425.1	3.28433	57.2	-	AQLS01	4	3160	2960	41380	43788	Contig	ftp://ftp.ncbi.nlm.nih.gov/genomes/all/GCF/000/366/425/GCF_000366425.1_Bruc_abor_88_19_V1	ftp://ftp.ncbi.nlm.nih.gov/genomes/all/GCA/000/366/425/GCA_000366425.1_Bruc_abor_88_19_V1
Brucella abortus 88/226	88/226	Mozambique	1988	cow		SAMN00811169	PRJNA173616	Proteobacteria	Alphaproteobacteria	GCA_000366445.1	3.28613	57.2	-	AQLT01	3	3160	2957	41380	43788	Contig	ftp://ftp.ncbi.nlm.nih.gov/genomes/all/GCF/000/366/445/GCF_000366445.1_Bruc_abor_88_226_V1	ftp://ftp.ncbi.nlm.nih.gov/genomes/all/GCA/000/366/445/GCA_000366445.1_Bruc_abor_88_226_V1
Brucella abortus 90/50	90/50	Saudi Arabia	1990	cow		SAMN00811171	PRJNA173618	Proteobacteria	Alphaproteobacteria	GCA_000366465.1	3.28633	57.2	-	AQLU01	4	3163	2954	41380	43788	Contig	ftp://ftp.ncbi.nlm.nih.gov/genomes/all/GCF/000/366/465/GCF_000366465.1_Bruc_abor_90_50_V1	ftp://ftp.ncbi.nlm.nih.gov/genomes/all/GCA/000/366/465/GCA_000366465.1_Bruc_abor_90_50_V1
Brucella abortus 94-1313	94-1313	USA	1994	Llama		SAMN02092517	PRJNA200938	Proteobacteria	Alphaproteobacteria	GCA_000413735.1	3.28596	57.2	-	ATGR01	5	3161	2951	41446	43839	Contig	ftp://ftp.ncbi.nlm.nih.gov/genomes/all/GCF/000/413/735/GCF_000413735.1_Bruc_abor_biovar_1_94-1313_V1	ftp://ftp.ncbi.nlm.nih.gov/genomes/all/GCA/000/413/735/GCA_000413735.1_Bruc_abor_biovar_1_94-1313_V1
Brucella abortus bv. 1 str. 9-941	9-941					SAMN02604220	PRJNA9619	Proteobacteria	Alphaproteobacteria	GCA_000008145.1	3.28645	57.2354	chromosome I:NC_006932.1/AE017223.1; chromosome II:NC_006933.1/AE017224.1	-	2	3155	2951	38447	43874	Complete Genome	ftp://ftp.ncbi.nlm.nih.gov/genomes/all/GCF/000/008/145/GCF_000008145.1_ASM814v1	ftp://ftp.ncbi.nlm.nih.gov/genomes/all/GCA/000/008/145/GCA_000008145.1_ASM814v1
Brucella abortus A13334	A13334	South Korea		cattle		SAMN02603577	PRJNA74681	Proteobacteria	Alphaproteobacteria	GCA_000238175.1	3.28603	57.2354	chromosome 1:NC_016795.1/CP003176.1; chromosome 2:NC_016777.1/CP003177.1	-	2	3375	3140	40892	43703	Complete Genome	ftp://ftp.ncbi.nlm.nih.gov/genomes/all/GCF/000/238/175/GCF_000238175.1_ASM23817v1	ftp://ftp.ncbi.nlm.nih.gov/genomes/all/GCA/000/238/175/GCA_000238175.1_ASM23817v1
Brucella abortus	A19	Inner Mongolia	2017	Water		SAMN09499628	PRJNA478292	Proteobacteria	Alphaproteobacteria	GCA_003290345.1	3.28617	57.2354	chromosome 1:NZ_CP030751.1/CP030751.1; chromosome 2:NZ_CP030752.1/CP030752.1	-	2	3368	3126	43289	43294	Complete Genome	ftp://ftp.ncbi.nlm.nih.gov/genomes/all/GCF/003/290/345/GCF_003290345.1_ASM329034v1	ftp://ftp.ncbi.nlm.nih.gov/genomes/all/GCA/003/290/345/GCA_003290345.1_ASM329034v1
Brucella abortus B10-0973	B10-0973	UAS	2010	Bison		SAMN02092523	PRJNA200944	Proteobacteria	Alphaproteobacteria	GCA_000413835.1	3.28645	57.2	-	ATGL01	4	3163	2958	41446	43839	Contig	ftp://ftp.ncbi.nlm.nih.gov/genomes/all/GCF/000/413/835/GCF_000413835.1_Bruc_abor_biovar_1_B10-0973_V1	ftp://ftp.ncbi.nlm.nih.gov/genomes/all/GCA/000/413/835/GCA_000413835.1_Bruc_abor_biovar_1_B10-0973_V1
Brucella abortus bv. 5 str. B3196	B3196	USA	2010		bv.5	SAMN02595354	PRJNA36509	Proteobacteria	Alphaproteobacteria	GCA_000163115.1	3.34344	57.1	-	ACXC01	48	3241	2997	40269	43787	Scaffold	ftp://ftp.ncbi.nlm.nih.gov/genomes/all/GCF/000/163/115/GCF_000163115.1_ASM16311v1	ftp://ftp.ncbi.nlm.nih.gov/genomes/all/GCA/000/163/115/GCA_000163115.1_ASM16311v1
Brucella abortus	BAB8416	Inner Mongolia	2013	human	bv.9	SAMN02712083	PRJNA243017	Proteobacteria	Alphaproteobacteria	GCA_001043295.1	3.27311	57.2353	chromosome 1:NZ_CP008774.1/CP008774.1; chromosome 2:NZ_CP008775.1/CP008775.1	-	2	3144	2939	42185	43792	Complete Genome	ftp://ftp.ncbi.nlm.nih.gov/genomes/all/GCF/001/043/295/GCF_001043295.1_ASM104329v1	ftp://ftp.ncbi.nlm.nih.gov/genomes/all/GCA/001/043/295/GCA_001043295.1_ASM104329v1
Brucella abortus	BAU21/S4023	Bangladesh	2017	Bos taurus	bv.3	SAMN11288435	PRJNA529883	Proteobacteria	Alphaproteobacteria	GCA_004704905.2	3.24423	57.2	-	SRJJ02	24	3324	3101	43563	43773	Contig	ftp://ftp.ncbi.nlm.nih.gov/genomes/all/GCF/004/704/905/GCF_004704905.2_ASM470490v2	ftp://ftp.ncbi.nlm.nih.gov/genomes/all/GCA/004/704/905/GCA_004704905.2_ASM470490v2
Brucella abortus bv. 3	BB12	Inner Mongolia	2008	cattle	bv.3	SAMN03387012	PRJNA266061	Proteobacteria	Alphaproteobacteria	GCA_003994025.1	3.242	57.3	-	JZHN01	17	3311	3099	43469	43471	Contig	ftp://ftp.ncbi.nlm.nih.gov/genomes/all/GCF/003/994/025/GCF_003994025.1_ASM399402v1	ftp://ftp.ncbi.nlm.nih.gov/genomes/all/GCA/003/994/025/GCA_003994025.1_ASM399402v1
Brucella abortus	BB13	Gansu	2019	cattle	bv.6	SAMN03381195	PRJNA266062	Proteobacteria	Alphaproteobacteria	GCA_003994075.1	3.24943	57.2	-	JZHP01	19	3328	3102	43469	43491	Contig	ftp://ftp.ncbi.nlm.nih.gov/genomes/all/GCF/003/994/075/GCF_003994075.1_ASM399407v1	ftp://ftp.ncbi.nlm.nih.gov/genomes/all/GCA/003/994/075/GCA_003994075.1_ASM399407v1
Brucella abortus bv. 1	BB14	Heilongjiang	2010	cattle	bv.1	SAMN03382533	PRJNA266063	Proteobacteria	Alphaproteobacteria	GCA_003994155.1	3.2502	57.2	-	JZHQ01	16	3330	3104	43469	43491	Contig	ftp://ftp.ncbi.nlm.nih.gov/genomes/all/GCF/003/994/155/GCF_003994155.1_ASM399415v1	ftp://ftp.ncbi.nlm.nih.gov/genomes/all/GCA/003/994/155/GCA_003994155.1_ASM399415v1
Brucella abortus BC95	BC95	Spain	1997	bovine		SAMN02297859	PRJNA213741	Proteobacteria	Alphaproteobacteria	GCA_000477635.1	3.2553	57.2	-	AXMO01	71	3179	2924	41568	43789	Scaffold	ftp://ftp.ncbi.nlm.nih.gov/genomes/all/GCF/000/477/635/GCF_000477635.1_Bruc_abor_BC95_V1	ftp://ftp.ncbi.nlm.nih.gov/genomes/all/GCA/000/477/635/GCA_000477635.1_Bruc_abor_BC95_V1
Brucella abortus bv. 1 str. BCB013	BCB013	Jilin	2010	Cattle	bv.1	SAMN02469333	PRJNA170709	Proteobacteria	Alphaproteobacteria	GCA_000292205.2	3.27351	57.3	-	ALOI02	297	3195	2975	41141	43820	Contig	ftp://ftp.ncbi.nlm.nih.gov/genomes/all/GCF/000/292/205/GCF_000292205.1_V02_for_genome_sequence_of_BCB013	ftp://ftp.ncbi.nlm.nih.gov/genomes/all/GCA/000/292/205/GCA_000292205.2_V02_for_genome_sequence_of_BCB013
Brucella abortus bv. 1 str. BCB027	BCB027	Jilin	1983	Deer	BV.1	SAMN02469343	PRJNA170704	Proteobacteria	Alphaproteobacteria	GCA_000292145.2	3.24092	57.3	-	ALOL02	292	3176	2953	41141	43820	Contig	ftp://ftp.ncbi.nlm.nih.gov/genomes/all/GCF/000/292/145/GCF_000292145.1_ASM29214v2	ftp://ftp.ncbi.nlm.nih.gov/genomes/all/GCA/000/292/145/GCA_000292145.2_ASM29214v2
Brucella abortus bv. 2 str. BCB034	BCB034	Sichuan	2000	human	bv.2	SAMN02469347	PRJNA170708	Proteobacteria	Alphaproteobacteria	GCA_000292025.2	3.25798	57.3	-	ALOP02	149	3141	2939	41141	43820	Contig	ftp://ftp.ncbi.nlm.nih.gov/genomes/all/GCF/000/292/025/GCF_000292025.1_ASM29202v2	ftp://ftp.ncbi.nlm.nih.gov/genomes/all/GCA/000/292/025/GCA_000292025.2_ASM29202v2
Brucella abortus	BD	Hebei	2008	dairy cow		SAMN07508059	PRJNA398311	Proteobacteria	Alphaproteobacteria	GCA_002262975.1	3.27107	57.2353	chromosome 1:NZ_CP022877.1/CP022877.1; chromosome 2:NZ_CP022878.1/CP022878.1	-	2	3145	2944	42969	43820	Complete Genome	ftp://ftp.ncbi.nlm.nih.gov/genomes/all/GCF/002/262/975/GCF_002262975.1_ASM226297v1	ftp://ftp.ncbi.nlm.nih.gov/genomes/all/GCA/002/262/975/GCA_002262975.1_ASM226297v1
Brucella abortus	BJ1	Beijing	2017	elk		SAMN10238131	PRJNA496294	Proteobacteria	Alphaproteobacteria	GCA_003675365.1	3.27058	57.2353	chromosome 1:NZ_CP033079.1/CP033079.1; chromosome 2:NZ_CP033080.1/CP033080.1	-	2	3343	3113	43396	43416	Complete Genome	ftp://ftp.ncbi.nlm.nih.gov/genomes/all/GCF/003/675/365/GCF_003675365.1_ASM367536v1	ftp://ftp.ncbi.nlm.nih.gov/genomes/all/GCA/003/675/365/GCA_003675365.1_ASM367536v1
Brucella abortus	Br.a-1236-10-Geo	Georgia	2010	bovine		SAMN05526411	PRJNA338234	Proteobacteria	Alphaproteobacteria	GCA_001856215.1	3.25632	57.2	-	MIJM01	26	3331	3110	42671	43666	Contig	ftp://ftp.ncbi.nlm.nih.gov/genomes/all/GCF/001/856/215/GCF_001856215.1_ASM185621v1	ftp://ftp.ncbi.nlm.nih.gov/genomes/all/GCA/001/856/215/GCA_001856215.1_ASM185621v1
Brucella abortus	Br.a-375-10-Geo	Georgia	2010	human		SAMN05526412	PRJNA338234	Proteobacteria	Alphaproteobacteria	GCA_001856265.1	3.25973	57.2	-	MIJN01	30	3333	3113	42671	43666	Contig	ftp://ftp.ncbi.nlm.nih.gov/genomes/all/GCF/001/856/265/GCF_001856265.1_ASM185626v1	ftp://ftp.ncbi.nlm.nih.gov/genomes/all/GCA/001/856/265/GCA_001856265.1_ASM185626v1
Brucella abortus	Brucexj51	Xinjiang	2016	Cattle		SAMN13565773	PRJNA448490	Proteobacteria	Alphaproteobacteria	GCA_009789365.1	3.25801	57.2	-	WSSF01	28	3137	2944	43820	43855	Contig	ftp://ftp.ncbi.nlm.nih.gov/genomes/all/GCF/009/789/365/GCF_009789365.1_ASM978936v1	ftp://ftp.ncbi.nlm.nih.gov/genomes/all/GCA/009/789/365/GCA_009789365.1_ASM978936v1
Brucella abortus	C-615	Russia	2017	Cow		SAMN10584523	PRJNA509561	Proteobacteria	Alphaproteobacteria	GCA_003984745.1	3.25236	57.2	-	RXOK01	45	3324	3088	43457	43702	Contig	ftp://ftp.ncbi.nlm.nih.gov/genomes/all/GCF/003/984/745/GCF_003984745.1_ASM398474v1	ftp://ftp.ncbi.nlm.nih.gov/genomes/all/GCA/003/984/745/GCA_003984745.1_ASM398474v1
Brucella abortus	clpP	Beijing	2019	Bovine		SAMN12827000	PRJNA573837	Proteobacteria	Alphaproteobacteria	GCA_008761575.1	3.27847	57.2353	chromosome 1:NZ_CP044338.1/CP044338.1; chromosome 2:NZ_CP044339.1/CP044339.1	-	2	3370	3132	43739	43745	Complete Genome	ftp://ftp.ncbi.nlm.nih.gov/genomes/all/GCF/008/761/575/GCF_008761575.1_ASM876157v1	ftp://ftp.ncbi.nlm.nih.gov/genomes/all/GCA/008/761/575/GCA_008761575.1_ASM876157v1
Brucella abortus CNGB 966	CNGB 966	Argentina	2005	human		SAMN01047742	PRJNA176531	Proteobacteria	Alphaproteobacteria	GCA_000366165.1	3.28587	57.2	-	AQMC01	2	3158	2953	41380	43788	Contig	ftp://ftp.ncbi.nlm.nih.gov/genomes/all/GCF/000/366/165/GCF_000366165.1_Bruc_abor_CNGB_966_V1	ftp://ftp.ncbi.nlm.nih.gov/genomes/all/GCA/000/366/165/GCA_000366165.1_Bruc_abor_CNGB_966_V1
Brucella abortus	Col-B012	Colombia	1997	Bos taurus		SAMN04323936	PRJNA305302	Proteobacteria	Alphaproteobacteria	GCA_001940595.1	3.23472	57.3	-	LODQ01	243	3397	3122	42744	43675	Contig	ftp://ftp.ncbi.nlm.nih.gov/genomes/all/GCF/001/940/595/GCF_001940595.1_ASM194059v1	ftp://ftp.ncbi.nlm.nih.gov/genomes/all/GCA/001/940/595/GCA_001940595.1_ASM194059v1
Brucella abortus F1/06-B21	F1/06-B21	Zimbabwe	2006	cow		SAMN00839722	PRJNA173525	Proteobacteria	Alphaproteobacteria	GCA_000370365.1	3.30356	57.2	-	AQJN01	4	3173	2949	41380	43788	Scaffold	ftp://ftp.ncbi.nlm.nih.gov/genomes/all/GCF/000/370/365/GCF_000370365.1_Bruc_abor_F1_06-B21_V1	ftp://ftp.ncbi.nlm.nih.gov/genomes/all/GCA/000/370/365/GCA_000370365.1_Bruc_abor_F1_06-B21_V1
Brucella abortus F10/06-3	F10/06-3	Thailand	2006	Bovine		SAMN00839709	PRJNA173512	Proteobacteria	Alphaproteobacteria	GCA_000370405.1	3.28684	57.2	-	AQJP01	5	3164	2945	41380	43788	Scaffold	ftp://ftp.ncbi.nlm.nih.gov/genomes/all/GCF/000/370/405/GCF_000370405.1_Bruc_abor_F10_06-3_V1	ftp://ftp.ncbi.nlm.nih.gov/genomes/all/GCA/000/370/405/GCA_000370405.1_Bruc_abor_F10_06-3_V1
Brucella abortus F2/06-8	F2/06-8	Portugal	2006	goat		SAMN00811174	PRJNA173614	Proteobacteria	Alphaproteobacteria	GCA_000365605.1	3.28447	57.2	-	AQME01	4	3163	2953	41380	43788	Contig	ftp://ftp.ncbi.nlm.nih.gov/genomes/all/GCF/000/365/605/GCF_000365605.1_Bruc_abor_F2_06-8_V1	ftp://ftp.ncbi.nlm.nih.gov/genomes/all/GCA/000/365/605/GCA_000365605.1_Bruc_abor_F2_06-8_V1
Brucella abortus F3/01-300	F3/01-300	Kosovo	2001	Bovine		SAMN01757984	PRJNA176541	Proteobacteria	Alphaproteobacteria	GCA_000365745.1	3.28642	57.2	-	AQMF01	3	3159	2962	41380	43788	Contig	ftp://ftp.ncbi.nlm.nih.gov/genomes/all/GCF/000/365/745/GCF_000365745.1_Bruc_abor_F3_01-0300_V1	ftp://ftp.ncbi.nlm.nih.gov/genomes/all/GCA/000/365/745/GCA_000365745.1_Bruc_abor_F3_01-0300_V1
Brucella abortus F6/05-9	F6/05-9	Sudan	2005	Bovine		SAMN00811182	PRJNA173630	Proteobacteria	Alphaproteobacteria	GCA_000370485.1	3.28095	57.2	-	AQJT01	13	3157	2947	41380	43788	Scaffold	ftp://ftp.ncbi.nlm.nih.gov/genomes/all/GCF/000/370/485/GCF_000370485.1_Bruc_abor_F6_05-9_V1	ftp://ftp.ncbi.nlm.nih.gov/genomes/all/GCA/000/370/485/GCA_000370485.1_Bruc_abor_F6_05-9_V1
Brucella abortus I103_(UK3/01)	I103_(UK3/01)	Ireland		cow		SAMN00811183	PRJNA173612	Proteobacteria	Alphaproteobacteria	GCA_000399725.1	3.28624	57.2	-	ASGX01	6	3162	2955	41410	43789	Contig	ftp://ftp.ncbi.nlm.nih.gov/genomes/all/GCF/000/399/725/GCF_000399725.1_Bruc_abor_I103_UK3_01_V1	ftp://ftp.ncbi.nlm.nih.gov/genomes/all/GCA/000/399/725/GCA_000399725.1_Bruc_abor_I103_UK3_01_V1
Brucella abortus	MC	Hebei	2011	cow		SAMN07508100	PRJNA398313	Proteobacteria	Alphaproteobacteria	GCA_002262995.1	3.27087	57.2353	chromosome 1:NZ_CP022879.1/CP022879.1; chromosome 2:NZ_CP022880.1/CP022880.1	-	2	3148	2948	42969	43820	Complete Genome	ftp://ftp.ncbi.nlm.nih.gov/genomes/all/GCF/002/262/995/GCF_002262995.1_ASM226299v1	ftp://ftp.ncbi.nlm.nih.gov/genomes/all/GCA/002/262/995/GCA_002262995.1_ASM226299v1
Brucella abortus	N1	Russia	2018	cow		SAMN10584386	PRJNA509541	Proteobacteria	Alphaproteobacteria	GCA_003984755.1	3.25153	57.2	-	RXOG01	58	3325	3086	43457	43702	Contig	ftp://ftp.ncbi.nlm.nih.gov/genomes/all/GCF/003/984/755/GCF_003984755.1_ASM398475v1	ftp://ftp.ncbi.nlm.nih.gov/genomes/all/GCA/003/984/755/GCA_003984755.1_ASM398475v1
Brucella abortus NI352	NI352	Northern Ireland	2008	Bovine		SAMN00811188	PRJNA173558	Proteobacteria	Alphaproteobacteria	GCA_000370505.1	3.28658	57.2	-	AQJU01	4	3159	2955	41380	43788	Scaffold	ftp://ftp.ncbi.nlm.nih.gov/genomes/all/GCF/000/370/505/GCF_000370505.1_Bruc_abor_NI352_V1	ftp://ftp.ncbi.nlm.nih.gov/genomes/all/GCA/000/370/505/GCA_000370505.1_Bruc_abor_NI352_V1
Brucella abortus NI649	NI649	Northern Ireland	2008	Bovine		SAMN00811204	PRJNA173555	Proteobacteria	Alphaproteobacteria	GCA_000366805.1	3.28603	57.2	-	AQMX01	6	3159	2955	41380	43788	Contig	ftp://ftp.ncbi.nlm.nih.gov/genomes/all/GCF/000/366/805/GCF_000366805.1_Bruc_abor_NI649_V1	ftp://ftp.ncbi.nlm.nih.gov/genomes/all/GCA/000/366/805/GCA_000366805.1_Bruc_abor_NI649_V1
Brucella abortus R42-08	R42-08	Mongolia	2008	cow		SAMN00839707	PRJNA173510	Proteobacteria	Alphaproteobacteria	GCA_000370565.1	3.29171	57.2	-	AQJX01	4	3173	2950	41380	43788	Scaffold	ftp://ftp.ncbi.nlm.nih.gov/genomes/all/GCF/000/370/565/GCF_000370565.1_Bruc_abor_R42-08_V1	ftp://ftp.ncbi.nlm.nih.gov/genomes/all/GCA/000/370/565/GCA_000370565.1_Bruc_abor_R42-08_V1
Brucella abortus	SKN13	India	2014	cattle		SAMN03945529	PRJNA291474	Proteobacteria	Alphaproteobacteria	GCA_001267725.1	3.27713	57.2	-	LIEA01	52	3178	2870	42230	43793	Contig	ftp://ftp.ncbi.nlm.nih.gov/genomes/all/GCF/001/267/725/GCF_001267725.1_ASM126772v1	ftp://ftp.ncbi.nlm.nih.gov/genomes/all/GCA/001/267/725/GCA_001267725.1_ASM126772v1
Brucella abortus bv. 3 str. Tulya	Tulya	Unknown	Unknown	Unknown		SAMN02595277	PRJNA33029	Proteobacteria	Alphaproteobacteria	GCA_000157715.1	3.28276	57.2	-	ACBI01	13	3135	2929	39836	43787	Scaffold	ftp://ftp.ncbi.nlm.nih.gov/genomes/all/GCF/000/157/715/GCF_000157715.1_ASM15771v1	ftp://ftp.ncbi.nlm.nih.gov/genomes/all/GCA/000/157/715/GCA_000157715.1_ASM15771v1
Brucella abortus	Wisconsin	USA	1940	Bos taurus		SAMEA2821531	PRJEB15039	Proteobacteria	Alphaproteobacteria	GCA_900095085.1	3.26612	57.2355	chromosome 1:NZ_LT671512.1/LT671512.1; chromosome 2:NZ_LT671513.1/LT671513.1	-	2	3146	2941	43129	43873	Chromosome	ftp://ftp.ncbi.nlm.nih.gov/genomes/all/GCF/900/095/085/GCF_900095085.1_14913_1_10	ftp://ftp.ncbi.nlm.nih.gov/genomes/all/GCA/900/095/085/GCA_900095085.1_14913_1_10
Brucella abortus	XZ19-1	Tibet	2019	yak		SAMN13565751	PRJNA448490	Proteobacteria	Alphaproteobacteria	GCA_009789215.1	3.27003	57.2	-	WSSE01	68	3157	2947	43820	43855	Contig	ftp://ftp.ncbi.nlm.nih.gov/genomes/all/GCF/009/789/215/GCF_009789215.1_ASM978921v1	ftp://ftp.ncbi.nlm.nih.gov/genomes/all/GCA/009/789/215/GCA_009789215.1_ASM978921v1
Brucella abortus	19BA	Russia	1951	vaccine strain		SAMN09405586	PRJNA475940			GCA_003244395.3	3.28417	57.2354	chromosome 1:NZ_CP077765.1/CP077765.1; chromosome 2:NZ_CP077764.1/CP077764.1		2	2929				Complete	ftp://ftp.ncbi.nlm.nih.gov/genomes/all/GCA/003/244/395/GCA_003244395.3_ASM324439v3	ftp://ftp.ncbi.nlm.nih.gov/genomes/all/GCF/003/244/395/GCF_003244395.3_ASM324439v3
Brucella abortus	S-595	Russia	2016	human blood		SAMN17050434	PRJNA684030	GCA_016091955.1	Contig	3.28294	57.3		JAEDPV01	31	2867	2020-12-15T00:00:00Z	ftp://ftp.ncbi.nlm.nih.gov/genomes/all/GCA/016/091/955/GCA_016091955.1_ASM1609195v1	ftp://ftp.ncbi.nlm.nih.gov/genomes/all/GCF/016/091/955/GCF_016091955.1_ASM1609195v1
Brucella abortus S19	S19	Unknown	Unknown	Unknown		SAMN02604294	PRJNA18999	GCA_000018725.1	Complete	3.28394	57.2354	chromosome 1:NC_010742.1/CP000887.1; chromosome 2:NC_010740.1/CP000888.1		2	2954	2008-05-22T00:00:00Z	ftp://ftp.ncbi.nlm.nih.gov/genomes/all/GCA/000/018/725/GCA_000018725.1_ASM1872v1	ftp://ftp.ncbi.nlm.nih.gov/genomes/all/GCF/000/018/725/GCF_000018725.1_ASM1872v1
Brucella abortus bv. 4 str. 292	292	Unknown	Unknown	Unknown		SAMN02595276	PRJNA33027	GCA_000157695.1	Scaffold	3.27294	57.2		ACBH01	12	2955	2009-01-23T00:00:00Z	ftp://ftp.ncbi.nlm.nih.gov/genomes/all/GCA/000/157/695/GCA_000157695.1_ASM15769v1	ftp://ftp.ncbi.nlm.nih.gov/genomes/all/GCF/000/157/695/GCF_000157695.1_ASM15769v1
Brucella abortus bv. 6 str. 870	870	Unknown	Unknown	Unknown		SAMN02595275	PRJNA33025	GCA_000157675.1	Scaffold	3.27034	57.2		ACBG01	13	2943	2009-01-23T00:00:00Z	ftp://ftp.ncbi.nlm.nih.gov/genomes/all/GCA/000/157/675/GCA_000157675.1_ASM15767v1	ftp://ftp.ncbi.nlm.nih.gov/genomes/all/GCF/000/157/675/GCF_000157675.1_ASM15767v1
Brucella abortus bv. 2 str. 86/8/59	86/8/59	Unknown	Unknown	Unknown		SAMN02595278	PRJNA33031	GCA_000157735.1	Scaffold	3.29491	57.1		ACBJ01	21	2935	2009-01-23T00:00:00Z	ftp://ftp.ncbi.nlm.nih.gov/genomes/all/GCA/000/157/735/GCA_000157735.1_ASM15773v1	ftp://ftp.ncbi.nlm.nih.gov/genomes/all/GCF/000/157/735/GCF_000157735.1_ASM15773v1
Brucella abortus bv. 9 str. C68	C68	Unknown	Unknown	Unknown		SAMN02595293	PRJNA33575	GCA_000158795.1	Scaffold	3.26958	57.2		ACEL01	13	2962	2009-02-18T00:00:00Z	ftp://ftp.ncbi.nlm.nih.gov/genomes/all/GCA/000/158/795/GCA_000158795.1_ASM15879v1	ftp://ftp.ncbi.nlm.nih.gov/genomes/all/GCF/000/158/795/GCF_000158795.1_ASM15879v1
Brucella abortus RB51-AHVLA	RB51-AHVLA	Unknown	Unknown	Unknown		SAMN01047752	PRJNA179135	GCA_000366025.1	Contig	3.28669	57.2		AQIE01	2	2964	2013-04-16T00:00:00Z	ftp://ftp.ncbi.nlm.nih.gov/genomes/all/GCA/000/366/025/GCA_000366025.1_Bruc_abor_RB51_V1	ftp://ftp.ncbi.nlm.nih.gov/genomes/all/GCF/000/366/025/GCF_000366025.1_Bruc_abor_RB51_V1
Brucella abortus	CIIMS-NV-4	India	2016	animal		SAMN08295219	PRJNA428582	GCA_002895145.1	Complete	3.28645	57.2354	chromosome I:NZ_CP025743.1/CP025743.1; chromosome II:NZ_CP025744.1/CP025744.1		2	2936	2018-01-22T00:00:00Z	ftp://ftp.ncbi.nlm.nih.gov/genomes/all/GCA/002/895/145/GCA_002895145.1_ASM289514v1	ftp://ftp.ncbi.nlm.nih.gov/genomes/all/GCF/002/895/145/GCF_002895145.1_ASM289514v1
Brucella abortus NCTC 8038	NCTC 8038	Unknown	2009	Unknown		SAMN02595309	PRJNA34743	GCA_000160255.1	Scaffold	3.27687	57.2		ACJJ01	16	2959	2009-09-18T00:00:00Z	ftp://ftp.ncbi.nlm.nih.gov/genomes/all/GCA/000/160/255/GCA_000160255.1_ASM16025v1	ftp://ftp.ncbi.nlm.nih.gov/genomes/all/GCF/000/160/255/GCF_000160255.1_ASM16025v1

## Sheet: Table S3
Table S3 The MIC values (μg/mL) for two B. abortus strains to nine drugs.
Items	Strains	RIF	CIP	LVX	TCY	STR	DOX	MON	SPX	CRO	SMZ
Ref. strain	16M	0.2	15	0.125	0.5	0.125	0.125	0.25	0.125	0.5	0.5
Tested strains	XHM5	0.2	0.125	0.125	0.5	0.125	0.125	0.125	0.125	0.5	0.75
	XHM22	0.5	0.125	0.023	0.5	0.125	0.125	0.75	0.125	0.25	0.25
Note: rifampin (RIF), ciprofloxacin (CIP), levofloxacin (LVX), tetracycline (TCY), streptomycin (STR), doxycycline (DOX), minocycline (MON), sparfloxacin (SPX), ceftriaxone sodium (CRO), and sulfamethoxazole (SMZ).

## Sheet: Table S4
Table S4 Overview of sequencing profile in two strains in this study
Sequence profile	Sample ID	Insert Size (bp)	Clean Reads Length(bp)	Raw Data (Mb)	Filtered Reads (%)	Clean Data (Mb)	Clean Data GC(%)	Clean Data Q20 (%)	Clean Data Q30 (%)
	XHM5	350	(150:150)	1488	20.9	1177	57.33	98.26	94.68
	XHM22	350	(150:150)	1503	18.68	1222	57.44	97.9	94.02
Contig	Sample ID	Total Num (>500bp)	Total Length(bp)	N50 Length (bp)	N90 Length (bp)	Max Length (bp)	Min Length (bp)	Sequence GC%
	XHM5	21	3256766	383549	119959	630471	593	57.24
	XHM22	18	3256846	383533	135585	630736	593	57.23
Genome Size	Sample ID	K-mer	K-mer Number	K-mer Depth	Genome Size (Mb)	Revised Size (Mb)	Heterozygous Rate (%)	Repeat Rate (%)
	XHM5	15	267660978	81.11	3.3	3.25	0.01	12.82
	XHM22	15	264643074	80.96	3.27	3.2	0.02	12.41
Scaffold	Sample ID	Total Num (>500bp)	Total Length (bp)	N50 Length (bp)	N90 Length (bp)	Max Length (bp)	Min Length (bp)	Sequence GC%
	XHM5	18	3256796	383549	119959	630471	593	57.24
	XHM22	18	3256846	383533	135585	630736	593	57.23
Code gene	Sample ID	Genome size(bp)	Gene number(#)	Gene total length (bp)	Gene average length (bp)	Gene length/Genome(%)
	XHM5	3256796	3258	2821230	866	86.63
	XHM22	3256846	3258	2820990	866	86.62

## Sheet: Figure S1
Figure S1 BCSP 31 PCR and AMOS-PCR detected two strains in the present study.

## Sheet: Figure S2
Figure S2 The Venn diagram of core gene in this study strains against 74 other compared strains

## Sheet: Figure S3
Figure S3 Gene family cluster analysis of two strains. (Note: strains from this study were marked with the bold.)

## Sheet: Figure S4
Figure S4 Heatmap depicting the distribution trait of virulence associate genes among the strains used in this study. Note: Numbers in each cell represent the percentage similarity of the nucleotides of each virulence gene with those of the reference strain 2308. (Note: strains from this study were marked with the bold).

## Sheet: Figure S5
Figure S5 Resistant gene analysis of the two strains in this study.
